# Supplementary material for: Ansamitocin P3-Loaded Gold-NanoCage Conjugated with Immune Checkpoint Inhibitor to Enhance Photo-Chemo-Thermal Maturation of Dendritic Cells for Hepatocellular Carcinoma
Source: MDPI journal article supplement (doi:10.3390/polym13162726), 2021-08-15
Supplement: s1 [file s1]

## Supporting Information:

### **Ansamitocin P3-loaded Gold-NanoCage Conjugated with Immune Checkpoint Inhibitor to Enhance Photo-Chemo-Thermal Maturation of Dendritic Cells for Hepatocellular Carcinoma**

Hung-Wei Cheng, Yu-Ling Ou, Chia-Chi Kuo, Hsin-Yi Tsao, and Huai-En Lu

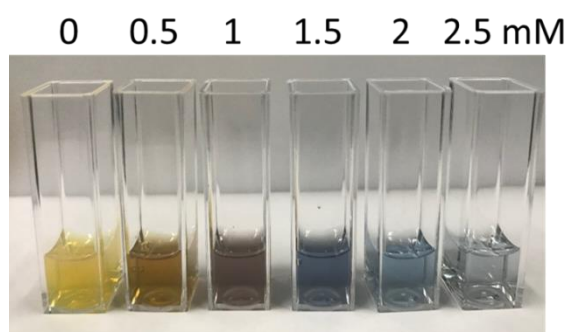

**Figure S1.**  $\text{HAuCl}_4$  solution (0, 0.5, 1, 1.5, 2, 2.5 mM) were used to titrate Ag nanocubes suspension and brilliant color was changed during Ag-Au alloy formation.

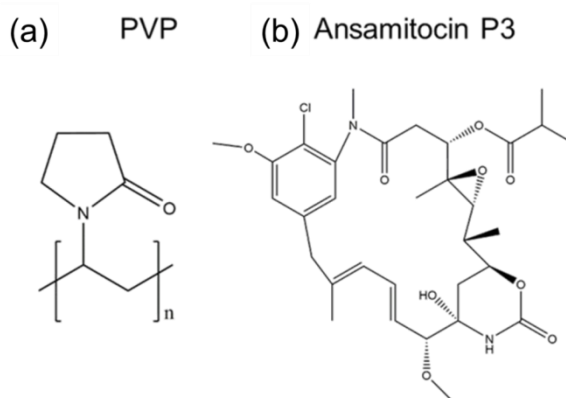

**Figure S2.** The structure of PVP and Anasmitocin P3

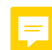

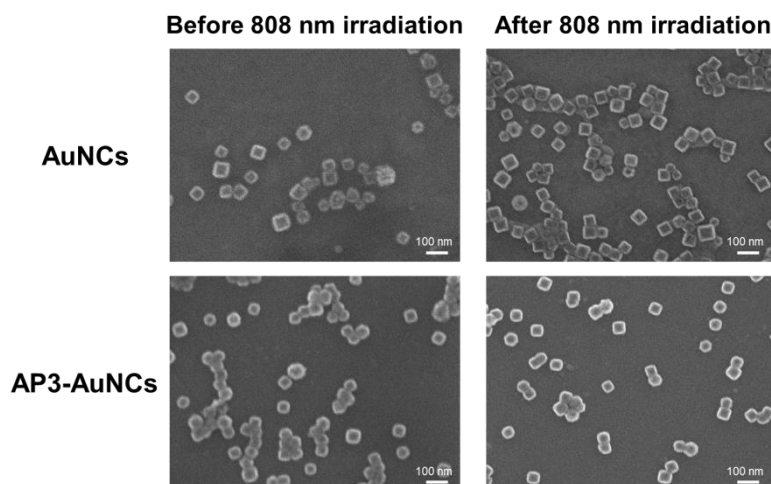

**Figure S3.** The morphology of AuNCs and AP3-AuNCs under 808 nm irradiation. 

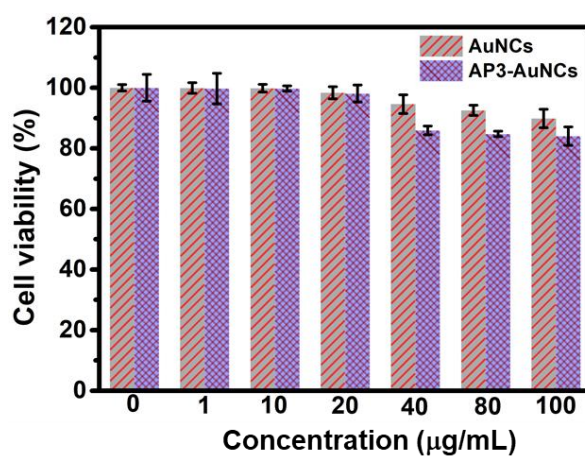

**Figure S4.** Evaluation of cell viability of Hep55.1c cells after incubation with various concentrations of AuNCs and AP3-AuNCs in dark for 24 h, respectively. Error bars are expressed standard error with n=3.

**Table S1.** Characterization of the AP3-AuNC constructed in different solvents

| Sample    | Solvent | Size(nm)   | Polydispersity<br>index | Zeta<br>potential |
|-----------|---------|------------|-------------------------|-------------------|
| AP3-AuNCs | Ddw     | 137.0±51.1 | 0.194                   | -8.28             |
|           | 80%EtOH | 113±38.9   | 0.124                   | -9.46             |
|           | 99%EtOH | 168.9±72.6 | 0.205                   | -2.55             |
